# Supplementary material for: Targeting the pentose phosphate pathway mitigates graft-versus-host disease by rewiring alloreactive T cell metabolism
Source: JCI journal article supplement (doi:10.1172/jci.insight.192774), 2025-12-07
Supplement: sd2 [file 2]

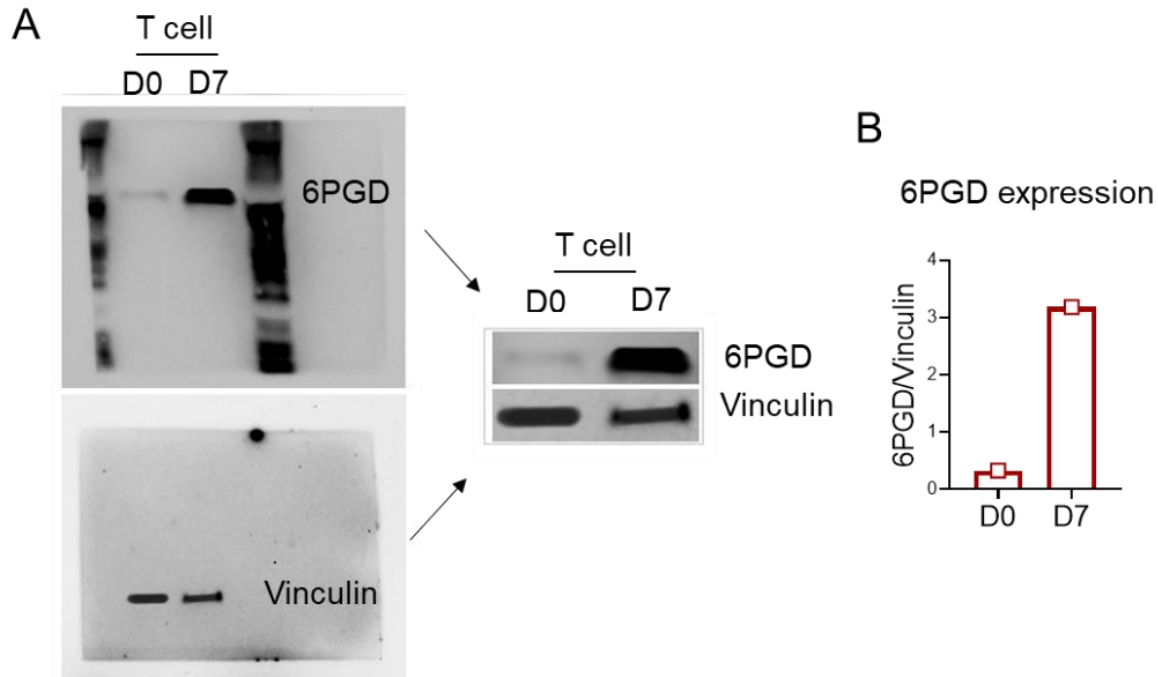

**6PGD expression is enhanced in T cells during GvHD development.**

(A-B) BALB/c (H-2<sup>d</sup>) mice were lethally irradiated (8.5 Gy) on day -1 and transplanted intravenously with  $3.5 \times 10^6$  TCD-BM with or without  $0.2 \times 10^6$  splenic naïve T cells from WT C57BL/6 (H-2<sup>b</sup>) mice on day 0. Expression of 6PGD was evaluated in donor T cells at the time of transplant (D0) compared to T cells isolated from recipient spleens on day +7 (D7) post transplantation by western blot analysis. Vinculin expression served as the control. Expression levels of 6PGD was calculated based on vinculin band expression.
